# Supplementary material for: Symbiophagy and biomineralization in the “living fossil” Astrosclera willeyana
Source: PubMed Central journal article supplement — Autophagy. 2013 Dec 12;10(3):408–15. doi: 10.4161/auto.27319 (PMC4077880; doi:10.4161/auto.27319), 2013-12-12
Supplement: auto-10-408-s01.pdf [file auto-10-408-s01.pdf]

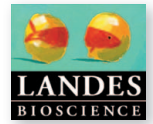

## **Supplemental Material to:**

**Rebecca Roberts, Wafa'T Al-Jamal, Matthew Whelband,  
Paul Thomas, Matthew Jefferson, Jeroen van den Bossche,  
Penny P. Powell, Kostas Kostarelos and Thomas Wileman**

**Symbiophagy and biomineralization in the “living fossil”  
*Astrosclera willeyana***

**Autophagy 2013; 10(3)**

**<http://dx.doi.org/10.4161/auto.27319>**

**[www.landesbioscience.com/journals/autophagy/article/27319](http://www.landesbioscience.com/journals/autophagy/article/27319)**

A FASTA formatted file of all ATG8 protein sequences used in our phylogenetic analysis.



>Cln XP\_002129578.1 gi1198417572|ref|XP\_002129578.1| PREDICTED: similar to predicted protein [Ciona intestinalis]  
MKRKYEHFQKRTGEGEKIKKYDVRVPIVEKAKARIGLDLKKKYLVPDQVYFLIKRKHLPEDALFFVNNVPPSTMQLYQEHIEEDFFLYIAYSDESVYGA

>Cln XP\_002129622.1 gi1198435488|ref|XP\_002129622.1| PREDICTED: similar to microtubule-associated protein 1 light chain 3 alpha [Ciona intestinalis]  
MPDRTKQFSDYKDRVQVSEI8KEPKPKPIVTERYQEQQLPVLDKTKFLVPMHSMKDLVRIIRRLQLSPSQAFLLVGHGMSVSDAVSEIYSEQQDEGFLYMYASQETFGT

>Nw\_165338 |gi|Nwem11653381|gi|Nwem11653381|est|Ext\_ggp\_C\_590022:1-116 [Nematostella vectensis]  
MKREYKEHPFKRAEGEKIKKYDVRVPIVEKAPKARIGLDLKKKYLVPDQVYFLIKRKHLPEDALFFVNNVPPSTMQLYQEHIEEDFFLYIAYSDESVYGCDD

>Nw\_181063 |gi|Nwem11810631|gi|Nwem11810631|est|Ext\_GenewiseL1\_C\_258015:1-116 [Nematostella vectensis]  
MKRAFKHSLDSRCQESSKIKRKYDVRVPIVEKAPKSTIQDIDKRFLLVPSDLVQAQMYIIRKRIQLPPEKAMFLFNKVLPTTSSMGSYEYEHKDEGFLYIAYSSENTFGH

>Nw\_241851 |gi|Nwem112418511|gi|Nwem112418511|est|Ext\_fmehs1\_pg\_C\_520094:14-127 [Nematostella vectensis]  
MADLDSRSGTFKPKFVSRDEVAGIAPKPKPIVTERYKEXDLPLDKTKFLVQDQLTMSQFVIIRNMGSLSTQAFYLLVNNKSLASMGTMALVEYEEKDEGFLYMYASQESGRULLESRPS

>Nw\_121733 |gi|Nwem11217331|gi|Nwem11217331e\_gp\_182\_87:1-199 [Nematostella vectensis]  
PTASRRRDESETITQYVQKIPVIERLTKENLPLDKIKYLVPSDLTMSLASSIKRKLQGTQAFLLVNEKNMSESTTVGEVYRDERDEGFLYMYASQESFG

>Hmg\_XP\_002170100.1 gi1221000727|ref|XP\_002170100.1| PREDICTED: similar to predicted protein [Hydra magnipapillata]  
MKREYKEHPFKRSGEGEKIKKYDVRVPIVQZFYLIKRIHLRAEDALFFVNNVPPSTMQLYQEHIEEDFFLYIAYSDESVYGV

>Hmg\_XP\_002163079.1 gi122111900|ref|XP\_002163079.1| PREDICTED: similar to predicted protein [Hydra magnipapillata]  
MSRAELMTGSRVGGVMEQCQESTKISKYDVRVPIVEKAPKSTIQDIDKRFLLVPSDLVQAQMYIIRKRIQLAPEKAMFLFNKVLPTTSSMGSYEYEHKDEGFLYIAYSSENTFGSI

>Hmg\_XP\_002163175.1 gi1221121766|ref|XP\_002163175.1| PREDICTED: similar to predicted protein [Hydra magnipapillata]  
MNDKSKYKPFKQKSFASRRDEVAGIAPKPKPIVTERYKELKALMLDKTKFLVQDQLTMSQFVIIRNMGSLAPTQSYLLVNNKSLASMTTLQEVYKDEKDEGFLYMYASQEMFGF

>Ami\_APG8 (GABARAPL2) [Astrasciera williyana]  
MKREFNIFEVRCAEAGIKRKYDVRVPIVEKAPKSTIQDIDKRFLLVPSDLVQAQMYIIRKRIQLAPEKAMFLFNKVLPTTSSMGSYEYEHKDEGFLYIAYSSENTFGI

>Adu\_XP\_002384394.1 gi1340371223|ref|XP\_002384394.1| PREDICTED: gamma-aminobutyric acid receptor-associated protein-like 2-like [Amphimedon queenslandica]  
MKREFNIFEVRCAEAGIKRKYDVRVPIVEKAPKSTIQDIDKRFLLVPSDLVQAQMYIIRKRIQLAPEKAMFLFNKVLPTTSSMGSYEYEHKDEGFLYIAYSSENTFGT

>Adu\_MP134BL3C gi1340374092|ref|XP\_002385572.1| PREDICTED: microtubule-associated proteins 1A/1B light chain 3C-like [Amphimedon queenslandica]  
MSTSEVPMFQKSFASRRDEVAGIAPKPKPIVTERYKELKALMLDKTKFLVQDQLTMSQFVIIRNMGSLAPTQSYLLVNNKSLASMTTLQEVYKDEKDEGFLYMYASQEFFG

>Adu\_MP134B3B gi1340373992|ref|XP\_002385523.1| PREDICTED: microtubule-associated proteins 1A/1B light chain 3B-like [Amphimedon queenslandica]  
MPSLNSHPKSFVEASRRDEVAGIAPKPKPIVTERYKELKALMLDKTKFLVQDQLTMSQFVIIRNMGSLAPTQSYLLVNNKSLASMTTLQEVYKDEKDEGFLYMYASQEFFG

>Adu\_GABA\_RAP2 gi1340371721|ref|XP\_002384393.1| PREDICTED: gamma-aminobutyric acid receptor-associated protein-like 2-like [Amphimedon queenslandica]  
MSKMKAYKDFKPEVLAASKREKPEVPIVEKAPKSTIQDIDKRFLLVPSDLVQAQMYIIRKRIQLAPEKAMFLFNKVLPTTSSMGSYEYEHKDEGFLYIAYSSENTFGI

>Adu\_GABA\_RAP gi1340376326|ref|XP\_002386684.1| PREDICTED: gamma-aminobutyric acid receptor-associated protein-like [Amphimedon queenslandica]  
MAFQTKYKQKSFQRRDEGQRLKINPKSVPIVGVKWSGLPDIDKRFLLVPSDLVQAQMYIIRKRIQLAPEKAMFLFNKVLPTTSSMGSYEYEHKDEGFLYIAYSSENTFGI

>Tad\_37981 |gi|Tfad1137901|est|Ext\_GenewisePlus\_C\_61165 (Hsa\_GABA\_A\_RAP hit) [Tricoplax adharens]  
MKRKYEDFPFKRSGEGEKIKKYDVRVPIVEKAPKARVQIDKIKYLVPAALTVQGFHFLIKRKHLPEDALFFVNNVPPSTMQLYQEHIEEDFFLYIAYSDESVYGL

>Tad\_35852 |gi|Tfad1135852|est|Ext\_GenewiseL\_C\_40895 (Hsa\_GABA\_A\_RAP hit) [Tricoplax adharens]  
MKRFQKEHITLGRQEGSAKIDAYDVRVPIVEKAPKSTIQDIDKRFLLVPSDLVQAQMYIIRKRIQLAPEKAMFLFNKVLPTTSSMGSYEYEHKDEGFLYIAYSSENTFGT

>Tad\_19802 |gi|Tfad1119802|e\_gp\_L1\_2269.1 (Hsa\_GABA\_A\_RAP hit) [Tricoplax adharens]  
MSKDYVSKGRSFCVKRQDQEIERYKPIVVERLHTEKHLPLDKNKLVPEDLTMSQFVIIRKRIQLAPEKAMFLFNKVLPTTSSMGSYEYEHKDEGFLYIAYSQETFGT

>Tad\_57027 |gi|Tfad1157027|fgeneshTAd\_pg\_C\_scaffold\_600000? (Hsa\_GABA\_A\_RAP hit) [Tricoplax adharens]  
MSFLVWPGQNFQKQSFARKAIVENYHFNKIPVTERYKELKALMLDKTKFLVQDQLTMSQFVIIRNMGSLAPTQSYLLVNNKSLASMTTLQEVYKDEKDEGFLYMYASQEMFGF

A Clustal formatted alignment file of all ATG8 protein sequences used in our phylogenetic analysis.

CLUSTAL W (1.7) multiple sequence alignment

```

Scer_ATG8      -----MKS--TFK---S--EYFPEKRAKES
Spon_ATG8      -----MKS--QFK---D--DFSEKRTKTES
Hsa_GABA_A_RAP -----MKF--YVK---E--EHPFEKRSSEG
Hsa_GABA_A_RAP1 -----MKF--QYK---E--DHPFEYRKKEG
Hsa_GABA_A_RAP2 -----MKW--MFK---E--DHSLEHRCVES
Hsa_MAP1A1B3   -----MPSEKTFK--Q--RRTEFQRVEDV
Hsa_MAP1A1B3A -----MPSDRPFK--Q--RRSFADRCREY
Hsa_MAP1A1B3B -----MKWRFSFGCG--KAADPDRARCEY
Hsa_MAP1A1B3C -----MPSEKTFK--Q--RRTEFQRVEDV
Hsa_MAP1A1B3D -----MPPPOKIPSVRPFK--Q--RKLATRQEEV
Mmu_GABA_RAP   -----MKF--YVK---E--EHPFEKRSSEG
Mmu_GABA_RAP1 -----MKF--QYK---E--DHPFEYRKKEG
Mmu_GABA_RAP2 -----MKW--MFK---E--DHSLEHRCVES
Mmu_MAP1A1B3   -----MPSEKTFK--Q--RRSFQRVEDV
Mmu_MAP1A1B3A -----MPSDRPFK--Q--RRSFADRCREY
Btau_GABA_RAP  -----MKF--YVK---E--EHPFEKRSSEG
Btau_GABA_RAP1 -----MKF--QYK---E--DHPFEYRKKEG
Btau_GABA_RAP2 -----MKW--MFK---E--DHSLEHRCVES
Btau_MAP1A1B3 -----MPSEKTFK--Q--RRSFQRVEDV
Btau_MAP1A1B3A -----MPTPKQSPSLRPFK--Q--RKLATRQEEV
Btau_MAP1A1B3B -----MPSEKTFK--Q--RRSFADRCREY
Btau_MAP1A1B3C -----MKF--YVK---E--EHPFEKRSSEG
Sko_predpro1   -----MKW--QFK---E--EHSIDQRRAEA
Sko_GABA_RAPa -----MKW--EYK---E--EHPFEKRSSEG
Sko_predpro2   -----MVDKDKYQYFK--Q--RKSFATRKEEV
Sko_MAP1C3a    -----MTT-KTKF--D--RRSFAQRTKQV
Lgig_105301    -----MKW--QYK---E--EHPFEKRSSEG
Lgig_122374    -----MKW--QYK---E--EHPFEKRSSEG
Lgig_122409    -----MKW--QYK---E--EHPFEKRSSEG
Lgig_209102    -----MHSKMTFK--E--RRTSQREKQV
Lgig_194601    -----MKSELQESLQTKFK--Q--RKSFATRKEEV
Ctel_21814     -----MKW--EYK---E--EHPFEKRSSEG
Ctel_4205     -----MKF--MFK---E--EHPFEKRSSEG
Ctel_2981     -----MPENDISVGRFKF--Q--RKSFAQRCREY
Ctel_128947    -----MLI--TFE--I--ILSTGTRKKQV
Dmel_ATG8a     -----MKF--QYK---E--EHPFEKRSSEG
Dmel_ATG8b     -----MNTV--QYK---E--EHPFEKRSSEG
AmeL_GABARAP  -----MKF--YVK---E--EHPFEKRSSEG
AmeL_MAP1A1B3A -----MNLTPKSKFK--E--RRSFAQRCREY
Spu_XP_782118_2 -----MKW--LTK---E--EHPFEKRSSEG
Spu_XP_786800_2 -----MKW--DVA--Y--DMWHRITSES
Spu_MAP1C3B    -----MK--SFK---E--RRSFAQRCREY
Spu_GABA_RAP_1like MNCRLMKELRFLGLATLVLVNRRVQDQVLRIEAKMKW--GFK---E--EHSIDQRRAEA
Spu_GABA_RAP_1like2 MKW--EYK---E--EHPFEKRSSEG
Spu_MAP1A1B3C -----MGTDKTTEAEKDAVYKFK--Q--RKTFSQRKEEV
Dre_GABA_A_RAP -----MKF--MFK---E--EHPFEKRSSEG
Dre_GABA_A_RAP1 -----MSS--QYK--R--SVLEVRRAEG
Dre_GABA_A_RAP1_iso1 -----MKF--QYK---E--EHPFEKRSSEG
Dre_GABA_A_RAP2 -----MKW--MFK---E--DHSLEHRCVES
Dre_MAP1A1B3a -----MPSDRPFK--Q--RRSFADRCREY
Dre_MAP1A1B3b -----MPSEKTFK--Q--RRTEFQRVEDV
Dre_MAP1A1B3c -----MPPPEKTPHPKPFK--Q--RKLATRQEEV
Dre_MAP1A1B3c_like -----MPPPEKSMVMPFK--Q--RKLATRQEEV
Cin_XP_002128871_1 -----MKW--QYK---E--EHPFEKRSSEG
Cin_XP_002129578_1 -----MKF--QYK---E--EHPFEKRSSEG
Cin_XP_002129622_1 -----MPGRTFK--Q--RRSFEDRVKQV
Nve_165338     -----MKW--EYK---E--EHPFEKRSSEG
Nve_181063     -----MKW--QYK---E--EHPFEKRSSEG
Nve_241851     -----MADLDSRSTFKFKF--Q--RKSFAQRCREY
Nve_121733     -----PTASRRRDS
Hnog_XP_002170100_1 -----MKW--EYK---E--EHPFEKRSSEG
Hnog_XP_002163079_1 -----MSRAELDMTSRAGY--DQWESRQKES
Hnog_XP_002163175_1 -----MNDSSSTPKFKF--Q--RKSFAQRCREY
Awi_AP68      -----MKW--EYK---E--EHPFEKRSSEG
Agu_XP_003384394_1 -----MKW--EYK---E--EHPFEKRSSEG
Agu_MAP1A1B3C -----MSTSEVPMTSQKQFK--Q--RKSFAQRCREY
Agu_MAP1A1B3B -----MPSSSNPKSTVESRQSTFVAKNFKF--E--RRTEFQRVEDV
Agu_GABA_RAP2 -----MSMKW--ANY--D--EKPEYVLAAEA
Agu_GABA_RAP  -----MAFQVTKYKQV--KPFQRRLEG
Tod_37901     -----MKW--QYK---E--EHPFEKRSSEG
Tod_35852     -----MKW--QYK---E--EHPFEKRSSEG
Tod_19802     -----MKW--QYK---E--EHPFEKRSSEG
Tod_57027     -----MSPLNVPQKQFKF--Q--RKSFAQRCREY

```

```

Scer_ATG8      ERTRDRFKNRIPVTEKAEKSD--IPEDIKRKYLVPAIDLTVGQFVYVIRKRIMLPPEKAI
Spon_ATG8      QRIRKYPDRIPVTEKAEKSD--IAADIKRKYLVPSDLTVGQFVYVIRKRIHLRRAEDALF
Hsa_GABA_A_RAP EKIRKYPDRIPVTEKAEKAPAR--IGDLKDKKYLVPDQTVGQFVYVIRKRIHLRRAEDALF
Hsa_GABA_A_RAP1 EKIRKYPDRIPVTEKAEKAPAR--VPDLKDKKYLVPDQTVGQFVYVIRKRIHLRRAEDALF
Hsa_GABA_A_RAP2 AKIRKYPDRIPVTEKAEKASQ--IVDIDKDKKYLVPDQTVGQFVYVIRKRIHLRRAEDALF
Hsa_MAP1A1B3   RLIREQHPKTPVIERYKGEKQLVLDKTKFLVPHVHMSLWIKIRRLQLNMQAFFF
Hsa_MAP1A1B3A QQIRDQHPKTPVIERYKGEKQLVLDKTKFLVPHVHMSLWIKIRRLQLNMQAFFF
Hsa_MAP1A1B3B QQIRDQHPKTPVIERYKGEKQLVLDKTKFLVPHVHMSLWIKIRRLQLNMQAFFF
Hsa_MAP1A1B3C RLIREQHPKTPVIERYKGEKQLVLDKTKFLVPHVHMSLWIKIRRLQLNMQAFFF
Hsa_MAP1A1B3D ACIRAKFPNKPVIVRYEETFLPDLKTKFLVQELTMTQFLSIRSMWLRTEAFY
Mmu_GABA_RAP   EKIRKYPDRIPVTEKAEKAPAR--IGDLKDKKYLVPDQTVGQFVYVIRKRIHLRRAEDALF
Mmu_GABA_RAP1 EKIRKYPDRIPVTEKAEKAPAR--VPDLKDKKYLVPDQTVGQFVYVIRKRIHLRRAEDALF
Mmu_GABA_RAP2 EKIRKYPDRIPVTEKAEKASQ--IVDIDKDKKYLVPDQTVGQFVYVIRKRIHLRRAEDALF
Mmu_MAP1A1B3   RLIREQHPKTPVIERYKGEKQLVLDKTKFLVPHVHMSLWIKIRRLQLNMQAFFF
Mmu_MAP1A1B3A QQIRDQHPKTPVIERYKGEKQLVLDKTKFLVPHVHMSLWIKIRRLQLNMQAFFF
Mmu_MAP1A1B3B QQIRDQHPKTPVIERYKGEKQLVLDKTKFLVPHVHMSLWIKIRRLQLNMQAFFF
Mmu_MAP1A1B3C RLIREQHPKTPVIERYKGEKQLVLDKTKFLVPHVHMSLWIKIRRLQLNMQAFFF
Btau_GABA_RAP EKIRKYPDRIPVTEKAEKAPAR--IGDLKDKKYLVPDQTVGQFVYVIRKRIHLRRAEDALF
Btau_GABA_RAP1 AKIRKYPDRIPVTEKAEKASQ--IVDIDKDKKYLVPDQTVGQFVYVIRKRIHLRRAEDALF
Btau_GABA_RAP2 AKIRKYPDRIPVTEKAEKASQ--IVDIDKDKKYLVPDQTVGQFVYVIRKRIHLRRAEDALF
Btau_MAP1A1B3C AGIRKFPNKPVIVRYEETFLPDLKTKFLVQELTMTQFLSIRSMWLRTEAFY
Btau_MAP1A1B3B RLIREQHPKTPVIERYKGEKQLVLDKTKFLVPHVHMSLWIKIRRLQLNMQAFFF
Btau_MAP1A1B3A RLIREQHPKTPVIERYKGEKQLVLDKTKFLVPHVHMSLWIKIRRLQLNMQAFFF
Sko_predpro1   SKIRKYPDRIPVTEKAEKASQ--IPDIDKDKKYLVPDQTVGQFVYVIRKRIHLRRAEDALF
Sko_GABA_RAPa EKIRKYPDRIPVTEKAEKAPAR--IGDLKDKKYLVPDQTVGQFVYVIRKRIHLRRAEDALF
Sko_predpro2   AKIRKFPNKPVIVRYEETFLPDLKTKFLVQELTMTQFLSIRSMWLRTEAFY
Sko_MAP1C3a    EKIRKYPDRIPVTEKAEKAPAR--VGDLDKDKKYLVPDQTVGQFVYVIRKRIHLRRAEDALF
Lgig_105301    SKIKTKYPERIPVTEKAEKASQ--IQDIDKDKKYLVPDQTVGQFVYVIRKRIHLRRAEDALF
Lgig_122374    SKIKTKYPERIPVTEKAEKASQ--IQDIDKDKKYLVPDQTVGQFVYVIRKRIHLRRAEDALF
Lgig_122409    SKIKTKYPERIPVTEKAEKASQ--IQDIDKDKKYLVPDQTVGQFVYVIRKRIHLRRAEDALF
Lgig_209102    ESTIDQHPKTPVIERYKGEKQLVLDKTKFLVPHVHMSLWIKIRRLQLNMQAFFF
Lgig_194601    GQIRKFPNKPVIVRYEETFLPDLKTKFLVQELTMTQFLSIRSMWLRTEAFY
Ctel_21814     EKIRKYPDRIPVTEKAEKAPAR--IGDLKDKKYLVPDQTVGQFVYVIRKRIHLRRAEDALF
Ctel_4205     AKIRKYPDRIPVTEKAEKASQ--VPDIDKDKKYLVPDQTVGQFVYVIRKRIHLRRAEDALF
Ctel_2981     AKIRKFPNKPVIVRYEETFLPDLKTKFLVQELTMTQFLSIRSMWLRTEAFY
Ctel_128947    DKIRKYPDRIPVTEKAEKAPAR--IGDLKDKKYLVPDQTVGQFVYVIRKRIHLRRAEDALF
Dmel_ATG8a     DKIRKYPDRIPVTEKAEKAPAR--IGDLKDKKYLVPDQTVGQFVYVIRKRIHLRRAEDALF
Dmel_ATG8b     DKIRKYPDRIPVTEKAEKAPAR--IGDLKDKKYLVPDQTVGQFVYVIRKRIHLRRAEDALF
AmeL_GABARAP  EKIRKYPDRIPVTEKAEKAPAR--IGDLKDKKYLVPDQTVGQFVYVIRKRIHLRRAEDALF
AmeL_MAP1A1B3A ELIDQHPKTPVIERYKGEKQLVLDKTKFLVPHVHMSLWIKIRRLQLNMQAFFF
Spu_XP_782118_2 EKIRKYPDRIPVTEKAEKAPAR--IGDLKDKKYLVPDQTVGQFVYVIRKRIHLRRAEDALF
Spu_XP_786800_2 SKIRKYPDRIPVTEKAEKASQ--VPDIDKDKKYLVPDQTVGQFVYVIRKRIHLRRAEDALF
Spu_MAP1C3B    EEIRKHPKTPVIERYKGEKQLVLDKTKFLVPHVHMSLWIKIRRLQLNMQAFFF
Spu_GABA_RAP_1like EKIRKYPDRIPVTEKAEKASQ--IVDIDKDKKYLVPDQTVGQFVYVIRKRIHLRRAEDALF
Spu_GABA_RAP_1like2 SKIRKYPDRIPVTEKAEKASQ--VPDIDKDKKYLVPDQTVGQFVYVIRKRIHLRRAEDALF
Spu_MAP1A1B3C AGIRAKFPNKPVIVRYEETFLPDLKTKFLVQELTMTQFLSIRSMWLRTEAFY
Dre_GABA_A_RAP EKIRKYPDRIPVTEKAEKAPAR--IGDLKDKKYLVPDQTVGQFVYVIRKRIHLRRAEDALF
Dre_GABA_A_RAP1 EKIRKYPDRIPVTEKAEKASQ--IVDIDKDKKYLVPDQTVGQFVYVIRKRIHLRRAEDALF
Dre_GABA_A_RAP2 AKIRKYPDRIPVTEKAEKASQ--IVDIDKDKKYLVPDQTVGQFVYVIRKRIHLRRAEDALF
Dre_MAP1A1B3a QQIRDQHPKTPVIERYKGEKQLVLDKTKFLVPHVHMSLWIKIRRLQLNMQAFFF
Dre_MAP1A1B3b RLIREQHPKTPVIERYKGEKQLVLDKTKFLVPHVHMSLWIKIRRLQLNMQAFFF
Dre_MAP1A1B3c CTIRSKFPNKPVIVRYEETFLPDLKTKFLVQELTMTQFLSIRSMWLRTEAFY
Dre_MAP1A1B3c_like SKIITKYPDRIPVTEKAEKASQ--IQDIDKDKKYLVPDQTVGQFVYVIRKRIHLRRAEDALF
Cin_XP_002128871_1 EKIRKYPDRIPVTEKAEKAPAR--IGDLKDKKYLVPDQTVGQFVYVIRKRIHLRRAEDALF
Cin_XP_002129578_1 EKIRKYPDRIPVTEKAEKASQ--IVDIDKDKKYLVPDQTVGQFVYVIRKRIHLRRAEDALF
Cin_XP_002129622_1 EKIRKYPDRIPVTEKAEKAPAR--IGDLKDKKYLVPDQTVGQFVYVIRKRIHLRRAEDALF
Nve_165338     SKIRKYPDRIPVTEKAEKASQ--IQDIDKDKKYLVPDQTVGQFVYVIRKRIHLRRAEDALF
Nve_181063     SKIRKYPDRIPVTEKAEKASQ--IQDIDKDKKYLVPDQTVGQFVYVIRKRIHLRRAEDALF
Nve_241851     AKIRKFPNKPVIVRYEETFLPDLKTKFLVQELTMTQFLSIRSMWLRTEAFY
Nve_121733     EKIRKYPDRIPVTEKAEKAPAR--IGDLKDKKYLVPDQTVGQFVYVIRKRIHLRRAEDALF
Hnog_XP_002170100_1 EKIRKYPDRIPVTEKAEKAPAR--IGDLKDKKYLVPDQTVGQFVYVIRKRIHLRRAEDALF
Hnog_XP_002163079_1 EKIRKYPDRIPVTEKAEKAPAR--IGDLKDKKYLVPDQTVGQFVYVIRKRIHLRRAEDALF
Hnog_XP_002163175_1 AKIRKFPNKPVIVRYEETFLPDLKTKFLVQELTMTQFLSIRSMWLRTEAFY

```

Awt\_AP68 AKIRGKYQDRIPVIVEKVPKSS--IPDIDKKKFLVPADLVAQFMVYIIRRRINLPSEKAMF  
Agu\_XP\_003384394\_1 AKIRGKYQDRIPVIVEKVPKSS--IPDIDKKKFLVPADLVAQFMVYIIRRRINLPSEKAMF  
Agu\_MAP1A1B3C ASLIVKFKFNVKVPVVEKVEKQKPLDLDKTKFLVPEELTISQGFVTLIRNKKLSTQAFY  
Agu\_MAP1A1B38 DEIVRKHQPQKPLVIERARTEKHLPLDLDKTKFLVPEELTMSQLTATIRKRMQLSEQAFY  
Agu\_GABA\_RAP2 SKIREKHPERVPVIVEKVSQ--IADLDKRYKLVPGDLTVAQFMVLRQRQLGATESTY  
Agu\_GABA\_RAP QRTLNKHPKVPVIVEKVKHSG--LPDIDNKFLLLPSSKVSQVIVYMNKLRPSHAPLY  
Tod\_37901 QKIRKRYKQDRIPVIVEKAPKAR--VQDIDKKKFLVPADLVAQFMVYIIRRRINLPSEKAMF  
Tod\_35852 AKIRAKYKQDRIPVIVEKAAKSS--IPDIDKKKFLVPADLVAQFMVYIIRRRINLPSEKAMF  
Tod\_19802 QETREKYPDKVVEKRLHEKHLPLDLDKTKFLVPEELTMSQFINIRKRLVLPNTQAFY  
Tod\_57027 ENIHRFPNKEPVEVYKRYKPLDLDKTKFLVPEELTMSQFVSIIRNMSLTPSQAFY

Scer\_ATG8 IFVND-ILPPTAALMSAIYQEHKDDGFLVYVYSGENTFGK-----  
Spon\_ATG8 IFIDE-ILPPTAALMSTIYEKSDGFLVYVYSGENTFGYVFF-----  
Hsa\_GABA\_A\_RAP FFVNN-VIPPTSATMQLYQEHDEDFLYIAYSDESQYK-----  
Hsa\_GABA\_A\_RAP1 FFVNN-TIPPTSATMQLYQEHDEDFLYIAYSDESQYK-----  
Hsa\_GABA\_A\_RAP2 LFVVK-TVPOSSLTMQLYQEKDEDFLYIAYSDETFG-----  
Hsa\_MAP1A1B3 LLVNGHMSVSTPISEVYEKDEDFLYIAYSDETFQKLSV-----  
Hsa\_MAP1A1B3A LLVNGHMSVSTPIADIEYQEKDEDFLYIAYSDETFG-----  
Hsa\_MAP1A1B3B LLVNGHMSVSTPIADIEYQEKDEDFLYIAYSDETFG-----  
Hsa\_MAP1A1B3B2 LLVNGHMSVSTPISEVYEKDEDFLYIAYSDETFQKLSV-----  
Hsa\_MAP1L32 LLVNNKLSVMSATMAEYRDKDEDFLYIAYSDETFGGLESAAPRGGSL-EDRPN  
Mmu\_GABA\_RAP FFVNN-TVPPSATMQLYQEHDEDFLYIAYSDESQYK-----  
Mmu\_GABA\_RAP1 FFVNN-TIPPTSATMQLYQEHDEDFLYIAYSDESQYK-----  
Mmu\_GABA\_RAP LFQNN-VIPPTSATMQLYGN-----TEHLR-----  
Mmu\_GABA\_RAP2 LFVVK-TVPOSSLTMQLYQEKDEDFLYIAYSDETFG-----  
Mmu\_MAP1A1B38 LLVNGHMSVSTPISEVYERDEDFLYIAYSDETFGAMV-----  
Mmu\_MAP1A1B3A LLVNGHMSVSTPIADIEYQEKDEDFLYIAYSDETFG-----  
Btau\_GABA\_RAP FFVNN-VIPPTSATMQLYQEHDEDFLYIAYSDESQYK-----  
Btau\_GABA\_RAP1 FFVNN-TIPPTSATMQLYQEHDEDFLYIAYSDESQYK-----  
Btau\_GABA\_RAP2 FFVNN-TIPPTSATMQLYQEHDEDFLYIAYSDESQYK-----  
Btau\_MAP1A1B3C LLVNNKLSMSMTLAEYRDKDEDFLYIAYSDETFG-----  
Btau\_MAP1A1B3B LLVNGHMSVSTPISEVYEKDEDFLYIAYSDETFQKLSV-----  
Btau\_MAP1A1B3A LLVNGHMSVSTPIADIEYQEKDEDFLYIAYSDETFG-----  
Sko\_predprot1 LFIER-VLPPTSATMQLYQEHDEDFLYIAYSDETFG-----  
Sko\_GABA\_RAPa FFVNN-VIPPTSATMQLYQEHDEDFLYIAYSDESQYK-----  
Sko\_predprot2 LLVNNKLSMSMTLAEYRDKDEDFLYIAYSDETFG-----  
Sko\_MAP1C3a LLVNEKMSVSTPISEVYERDEDFLYIAYSDETFGANN-----  
Lgig\_105301 FFVNN-VIPPTSATMQLYQEHDEDFLYIAYSDESQYK-----  
Lgig\_122374 LFVVK-TVPPSATMQLYQEHDEDFLYIAYSDETFG-----  
Lgig\_122409 LFVVK-TVPPSATMQLYQEHDEDFLYIAYSDETFG-----  
Lgig\_209102 LLVNHMSVSTPISEVYERDEDFLYIAYSDETFG-----  
Lgig\_194601 LLVNNKLSMSMTLAEYRDKDEDFLYIAYSDETFG-----  
Cte1\_21814 FFVNN-VIPPTSATMQLYQEHDEDFLYIAYSDESQYK-----  
Cte1\_4205 LFVVK-TVPOSSLTMQLYQEHDEDFLYIAYSDETFG-----  
Cte1\_2981 LLVNNKLSMSMTLAEYRDKDEDFLYIAYSDETFG-----  
Cte1\_128947 LLVNSRMSVSTPISEVYERDEDFLYIAYSDETFG-----  
Dme1\_ATG8a FFVNN-VIPPTSATMQLYQEHDEDFLYIAYSDESQYK-----  
Dme1\_ATG8b FFVNN-VIPPTSATMQLYQEHDEDFLYIAYSDESQYK-----  
Ame1\_GABARAP FFVNN-TIPPTSATMQLYQEHDEDFLYIAYSDESQYK-----  
Ame1\_MAP1A1B3A LLVNNKLSMSMTLAEYRDKDEDFLYIAYSDETFG-----  
Spu\_XP\_782118\_2 FFVNN-VIPPTSATMQLYQEHDEDFLYIAYSDESQYK-----  
Spu\_XP\_786800\_2 LFVVK-TVPOSSLTMQLYQEHDEDFLYIAYSDETFG-----  
Spu\_MAP1C3b LLVNNKLSMSMTLAEYRDKDEDFLYIAYSDETFG-----  
Spu\_GABA\_RAP\_1like LFVNE-VTPAASSTLAEVDAEHRDQDFLYIAYSDETFG-----  
Spu\_GABA\_RAP\_1like2 LFVVK-TVPOSSLTMQLYQEHDEDFLYIAYSDETFG-----  
Spu\_MAP1A1B3C LLVNNKLSMSMTLAEYRDKDEDFLYIAYSDETFG-----  
Dre\_GABA\_A\_RAP FFVNN-VIPPTSATMQLYQEHDEDFLYIAYSDESQYK-----  
Dre\_GABA\_A\_RAP1 FFVNN-SLPPSSPLSAVYEHDEDFLYIAYSDESQYK-----  
Dre\_GABA\_A\_RAP1\_iso1 FFVNN-VIPPTSATMQLYQEHDEDFLYIAYSDESQYK-----  
Dre\_GABA\_A\_RAP2 LFVVK-TVPOSSLTMQLYQEHDEDFLYIAYSDETFG-----  
Dre\_MAP1A1B3a LLVNGHMSVSTPISEVYERDEDFLYIAYSDETFG-----  
Dre\_MAP1A1B3b LLVNGHMSVSTPISEVYERDEDFLYIAYSDETFG-----  
Dre\_MAP1A1B3c LLVNNKLSMSMTLAEYRDKDEDFLYIAYSDETFG-----  
Dre\_MAP1A1B3C\_1like LLVSKMSCLASMSGYSQFRDQDFLYIAYSDETFG-----  
Cin\_XP\_002128871\_1 FFVNN-VIPPTSATMQLYQEHDEDFLYIAYSDETFG-----  
Cin\_XP\_002129578\_1 FFVNN-VIPPTSATMQLYQEHDEDFLYIAYSDESQYK-----  
Cin\_XP\_002129622\_1 LLVNGHMSVSDAVSEYQEKDEDFLYIAYSDETFG-----  
Nve\_165338 FFVNN-VIPPTSATMQLYQEHDEDFLYIAYSDESQYK-----  
Nve\_181063 LFVVK-TVPPSATMQLYQEHDEDFLYIAYSDETFG-----  
Nve\_241851 LLVNNKLSMSMTLAEYRDKDEDFLYIAYSDETFG-----  
Nve\_121733 LLVNEKMSVSTPISEVYERDEDFLYIAYSDETFG-----  
Hmgg\_XP\_002170100\_1 FFVNN-VIPPTSATMQLYQEHDEDFLYIAYSDESQYK-----  
Hmgg\_XP\_002163079\_1 LFVVK-TVPPSATMQLYQEHDEDFLYIAYSDETFG-----  
Hmgg\_XP\_002163175\_1 LLVNNKLSMSMTLAEYRDKDEDFLYIAYSDETFG-----  
Awt\_AP68 LFVVK-TVPPSATMQLYQEHDEDFLYIAYSDETFG-----  
Agu\_XP\_003384394\_1 LFVVK-TVPPSATMQLYQEHDEDFLYIAYSDETFG-----  
Agu\_MAP1A1B3C LLVNNKLSMSMTLAEYRDKDEDFLYIAYSDETFG-----  
Agu\_MAP1A1B38 LLVNGHMSVSTPISEVYERDEDFLYIAYSDETFG-----  
Agu\_GABA\_RAP2 VMVDG-ITPPTSTMTAIVYQKDDGFLYIAYSDETFG-----  
Agu\_GABA\_RAP LYVNDVLGATDSTLRLYQRESDYFLYCYEYGTASSDRES-----  
Tod\_37901 FTVNN-VIPPTSATMQLYQEHDEDFLYIAYSDESQYK-----  
Tod\_35852 LFVVK-TVPPSATMQLYQEHDEDFLYIAYSDETFG-----  
Tod\_19802 LLVNNKLSMSMTLAEYRDKDEDFLYIAYSDETFG-----  
Tod\_57027 LLVNNKLSVMTTLLTEVYRDEKDDGFLYIAYSDETFG-----

Scer\_ATG8 --  
Spon\_ATG8 --  
Hsa\_GABA\_A\_RAP --  
Hsa\_GABA\_A\_RAP1 --  
Hsa\_GABA\_A\_RAP2 --  
Hsa\_MAP1A1B3 --  
Hsa\_MAP1A1B3A --  
Hsa\_MAP1A1B3B --  
Hsa\_MAP1A1B3B2 --  
Hsa\_MAP1L32 PL  
Mmu\_GABA\_RAP --  
Mmu\_GABA\_RAP1 --  
Mmu\_GABA\_RAP --  
Mmu\_GABA\_RAP2 --  
Mmu\_MAP1A1B38 --  
Mmu\_MAP1A1B3A --  
Mmu\_MAP1A1B3B --  
Btau\_GABA\_RAP --  
Btau\_GABA\_RAP1 --  
Btau\_GABA\_RAP2 --  
Btau\_MAP1A1B3C PL  
Btau\_MAP1A1B3B --  
Btau\_MAP1A1B3A --  
Sko\_predprot1 --  
Sko\_GABA\_RAPa --  
Sko\_predprot2 --  
Sko\_MAP1C3a --  
Lgig\_105301 --  
Lgig\_122374 --  
Lgig\_122409 --  
Lgig\_209102 --  
Lgig\_194601 --  
Cte1\_21814 --  
Cte1\_4205 --  
Cte1\_2981 --  
Cte1\_128947 --  
Dme1\_ATG8a --  
Dme1\_ATG8b --  
Ame1\_GABARAP --  
Ame1\_MAP1A1B3A --  
Spu\_XP\_782118\_2 --  
Spu\_XP\_786800\_2 --  
Spu\_MAP1C3b --  
Spu\_GABA\_RAP\_1like --  
Spu\_GABA\_RAP\_1like2 --  
Spu\_MAP1A1B3C --  
Dre\_GABA\_A\_RAP --  
Dre\_GABA\_A\_RAP1 --  
Dre\_GABA\_A\_RAP1\_iso1 --  
Dre\_GABA\_A\_RAP2 --  
Dre\_MAP1A1B3a --  
Dre\_MAP1A1B3b --  
Dre\_MAP1A1B3c --  
Dre\_MAP1A1B3C\_1like --  
Cin\_XP\_002128871\_1 --

Cin\_XP\_002129578\_1 --  
Cin\_XP\_002129622\_1 --  
Nve\_165338 --  
Nve\_181063 --  
Nve\_241851 --  
Nve\_121733 --  
Hnog\_XP\_002170100\_1 --  
Hnog\_XP\_002163079\_1 --  
Hnog\_XP\_002163175\_1 --  
Aw1\_APG8 --  
Agu\_XP\_003384304\_1 --  
Agu\_MAP1A83C --  
Agu\_MAP1A83B --  
Agu\_GABA\_RAP2 --  
Agu\_GABA\_RAP --  
Tod\_37901 --  
Tod\_35852 --  
Tod\_19802 --  
Tod\_57027 --



A Nexus formatted alignment file of all ATG8 protein sequences used in our phylogenetic analysis consisting of only highly conserved domains as selected by G-Blocks.

INEXUS

begin data;  
dimensions ntax=73 nchar=96;  
format datatype=protein missing=? gap=;

matrix

```
Scer_AT68      FEKRAEIERADRFKRIKIPVIEKAKAEKIDKIKKYLVPALTVGQFVYVZKRIKMLPPEKAIFFPTAALMSATYQEHKDDGFLVYTSGENTFG  
Spon_AT68      FEKRTTEISQREIKYDRIKIPVIEKAKAEKIDKIKKYLVPALTVGQFVYVZKRIKMLPPEKAIFFPTAALMSATYQEHKDDGFLVYTSGENTFG  
Hsg_GABA_A_RAP FEKRRSEGEKIKRKYDRIKIPVIEKAKAEKIDKIKKYLVPALTVGQFVYVZKRIKMLPPEKAIFFPTAALMSATYQEHKDDGFLVYTSGENTFG  
Hsg_GABA_A_RAP1 FEYRQKEGEKIKRKYDRIKIPVIEKAKAEKIDKIKKYLVPALTVGQFVYVZKRIKMLPPEKAIFFPTAALMSATYQEHKDDGFLVYTSGENTFG  
Hsg_GABA_A_RAP2 LEHRVCSAKIKRKYDRIKIPVIEKAKAEKIDKIKKYLVPALTVGQFVYVZKRIKMLPPEKAIFFPTAALMSATYQEHKDDGFLVYTSGENTFG  
Hsg_MAP1A1B3 FEQRVEDVRLREIQPTKIPVIEERYKGPDKLTKFLVPHVNMSELIXI2RRRLQLMNAQAFVYSVSTPSEVYESEKDDGFLVYTSGENTFG  
Hsg_MAP1A1B3A FADRCIKVQIIRQDQPKIPVIEERYKGPDKLTKFLVPHVNMSELIXI2RRRLQLMNAQAFVYSVSTPSEVYESEKDDGFLVYTSGENTFG  
Hsg_MAP1A1B3B PADRCIKVQIIRQDQPKIPVIEERYKGPDKLTKFLVPHVNMSELIXI2RRRLQLMNAQAFVYSVSTPSEVYESEKDDGFLVYTSGENTFG  
Hsg_MAP1A1B3C FEQRVEDVRLREIQPTKIPVIEERYKGPDKLTKFLVPHVNMSELIXI2RRRLQLMNAQAFVYSVSTPSEVYESEKDDGFLVYTSGENTFG  
Hsg_MAP1A1B3D FEYRQKEGEKIKRKYDRIKIPVIEKAKAEKIDKIKKYLVPALTVGQFVYVZKRIKMLPPEKAIFFPTAALMSATYQEHKDDGFLVYTSGENTFG  
Mhu_GABA_RAP1 FEYRQKEGEKIKRKYDRIKIPVIEKAKAEKIDKIKKYLVPALTVGQFVYVZKRIKMLPPEKAIFFPTAALMSATYQEHKDDGFLVYTSGENTFG  
Mhu_GABA_RAP2 LEHRVCSAKIKRKYDRIKIPVIEKAKAEKIDKIKKYLVPALTVGQFVYVZKRIKMLPPEKAIFFPTAALMSATYQEHKDDGFLVYTSGENTFG  
Mhu_GABA_RAP3 FEQRVEDVRLREIQPTKIPVIEERYKGPDKLTKFLVPHVNMSELIXI2RRRLQLMNAQAFVYSVSTPSEVYESEKDDGFLVYTSGENTFG  
Mhu_MAP1A1B3 FEYRQKEGEKIKRKYDRIKIPVIEKAKAEKIDKIKKYLVPALTVGQFVYVZKRIKMLPPEKAIFFPTAALMSATYQEHKDDGFLVYTSGENTFG  
Mhu_MAP1A1B3A FADRCIKVQIIRQDQPKIPVIEERYKGPDKLTKFLVPHVNMSELIXI2RRRLQLMNAQAFVYSVSTPSEVYESEKDDGFLVYTSGENTFG  
Mhu_MAP1A1B3B PADRCIKVQIIRQDQPKIPVIEERYKGPDKLTKFLVPHVNMSELIXI2RRRLQLMNAQAFVYSVSTPSEVYESEKDDGFLVYTSGENTFG  
Mhu_MAP1A1B3C FEQRVEDVRLREIQPTKIPVIEERYKGPDKLTKFLVPHVNMSELIXI2RRRLQLMNAQAFVYSVSTPSEVYESEKDDGFLVYTSGENTFG  
Rtnu_GABA_RAP2 LEHRVCSAKIKRKYDRIKIPVIEKAKAEKIDKIKKYLVPALTVGQFVYVZKRIKMLPPEKAIFFPTAALMSATYQEHKDDGFLVYTSGENTFG  
Rtnu_MAP1A1B3C LEHRVCSAKIKRKYDRIKIPVIEKAKAEKIDKIKKYLVPALTVGQFVYVZKRIKMLPPEKAIFFPTAALMSATYQEHKDDGFLVYTSGENTFG  
Sko_ppredprot1 FEYRQKEGEKIKRKYDRIKIPVIEKAKAEKIDKIKKYLVPALTVGQFVYVZKRIKMLPPEKAIFFPTAALMSATYQEHKDDGFLVYTSGENTFG  
Sko_GABA_RAP2 LEHRVCSAKIKRKYDRIKIPVIEKAKAEKIDKIKKYLVPALTVGQFVYVZKRIKMLPPEKAIFFPTAALMSATYQEHKDDGFLVYTSGENTFG  
Sko_ppredprot2 FEYRQKEGEKIKRKYDRIKIPVIEKAKAEKIDKIKKYLVPALTVGQFVYVZKRIKMLPPEKAIFFPTAALMSATYQEHKDDGFLVYTSGENTFG  
Sko_MAP1C3a FADRCIKVQIIRQDQPKIPVIEERYKGPDKLTKFLVPHVNMSELIXI2RRRLQLMNAQAFVYSVSTPSEVYESEKDDGFLVYTSGENTFG  
Lg1g_105301 FEQRVEDVRLREIQPTKIPVIEERYKGPDKLTKFLVPHVNMSELIXI2RRRLQLMNAQAFVYSVSTPSEVYESEKDDGFLVYTSGENTFG  
Lg1g_122374 FEYRQKEGEKIKRKYDRIKIPVIEKAKAEKIDKIKKYLVPALTVGQFVYVZKRIKMLPPEKAIFFPTAALMSATYQEHKDDGFLVYTSGENTFG  
Lg1g_122409 IDHRAEISAKIKRKYDRIKIPVIEKAKAEKIDKIKKYLVPALTVGQFVYVZKRIKMLPPEKAIFFPTAALMSATYQEHKDDGFLVYTSGENTFG  
Lg1g_209102 FSQRKEVSEISNKGPKIPVIEERYKGPDKLTKFLVPHVNMSELIXI2RRRLQLMNAQAFVYSVSTPSEVYESEKDDGFLVYTSGENTFG  
Lg1g_214601 FATRKEVAGIRAKFPIKIPVIEERYKGPDKLTKFLVPHVNMSELIXI2RRRLQLMNAQAFVYSVSTPSEVYESEKDDGFLVYTSGENTFG  
Ctel_21814 FEKRAEIEKIKRKYDRIKIPVIEKAKAEKIDKIKKYLVPALTVGQFVYVZKRIKMLPPEKAIFFPTAALMSATYQEHKDDGFLVYTSGENTFG  
Ctel_4205 FEQRNEISAKIKRKYDRIKIPVIEKAKAEKIDKIKKYLVPALTVGQFVYVZKRIKMLPPEKAIFFPTAALMSATYQEHKDDGFLVYTSGENTFG  
Ctel_2081 FADRCIKVQIIRQDQPKIPVIEERYKGPDKLTKFLVPHVNMSELIXI2RRRLQLMNAQAFVYSVSTPSEVYESEKDDGFLVYTSGENTFG  
Ctel_128947 TGTRKDDVQIIRQDQPKIPVIEERYKGPDKLTKFLVPHVNMSELIXI2RRRLQLMNAQAFVYSVSTPSEVYESEKDDGFLVYTSGENTFG  
Dml_AT68      FEKRAEIEKIKRKYDRIKIPVIEKAKAEKIDKIKKYLVPALTVGQFVYVZKRIKMLPPEKAIFFPTAALMSATYQEHKDDGFLVYTSGENTFG  
Dml_AT68B FEYRQKEGEKIKRKYDRIKIPVIEKAKAEKIDKIKKYLVPALTVGQFVYVZKRIKMLPPEKAIFFPTAALMSATYQEHKDDGFLVYTSGENTFG  
Aml_GABARAP FEYRQKEGEKIKRKYDRIKIPVIEKAKAEKIDKIKKYLVPALTVGQFVYVZKRIKMLPPEKAIFFPTAALMSATYQEHKDDGFLVYTSGENTFG  
Aml_MAP1A1B3A FADRCIKVQIIRQDQPKIPVIEERYKGPDKLTKFLVPHVNMSELIXI2RRRLQLMNAQAFVYSVSTPSEVYESEKDDGFLVYTSGENTFG  
Spu_XP_782118_2 FEQRVEDVRLREIQPTKIPVIEERYKGPDKLTKFLVPHVNMSELIXI2RRRLQLMNAQAFVYSVSTPSEVYESEKDDGFLVYTSGENTFG  
Spu_XP_789800_2 FEYRQKEGEKIKRKYDRIKIPVIEKAKAEKIDKIKKYLVPALTVGQFVYVZKRIKMLPPEKAIFFPTAALMSATYQEHKDDGFLVYTSGENTFG  
Spu_MAP11CB FEQRVEDVRLREIQPTKIPVIEERYKGPDKLTKFLVPHVNMSELIXI2RRRLQLMNAQAFVYSVSTPSEVYESEKDDGFLVYTSGENTFG  
Spu_GABA_RAP_11ke FEYRQKEGEKIKRKYDRIKIPVIEKAKAEKIDKIKKYLVPALTVGQFVYVZKRIKMLPPEKAIFFPTAALMSATYQEHKDDGFLVYTSGENTFG  
Spu_GABA_RAP_11ke2 FEYRQKEGEKIKRKYDRIKIPVIEKAKAEKIDKIKKYLVPALTVGQFVYVZKRIKMLPPEKAIFFPTAALMSATYQEHKDDGFLVYTSGENTFG  
Spu_MAP1A1B3C FEYRQKEGEKIKRKYDRIKIPVIEKAKAEKIDKIKKYLVPALTVGQFVYVZKRIKMLPPEKAIFFPTAALMSATYQEHKDDGFLVYTSGENTFG  
Dre_GABA_A_RAP FEYRQKEGEKIKRKYDRIKIPVIEKAKAEKIDKIKKYLVPALTVGQFVYVZKRIKMLPPEKAIFFPTAALMSATYQEHKDDGFLVYTSGENTFG  
Dre_GABA_A_RAP1 FEYRQKEGEKIKRKYDRIKIPVIEKAKAEKIDKIKKYLVPALTVGQFVYVZKRIKMLPPEKAIFFPTAALMSATYQEHKDDGFLVYTSGENTFG  
Dre_GABA_A_RAP2 LEHRVCSAKIKRKYDRIKIPVIEKAKAEKIDKIKKYLVPALTVGQFVYVZKRIKMLPPEKAIFFPTAALMSATYQEHKDDGFLVYTSGENTFG  
Dre_MAP1A1B3a FEQRVEDVRLREIQPTKIPVIEERYKGPDKLTKFLVPHVNMSELIXI2RRRLQLMNAQAFVYSVSTPSEVYESEKDDGFLVYTSGENTFG  
Dre_MAP1A1B3b FEQRVEDVRLREIQPTKIPVIEERYKGPDKLTKFLVPHVNMSELIXI2RRRLQLMNAQAFVYSVSTPSEVYESEKDDGFLVYTSGENTFG  
Dre_MAP1A1B3c FEQRVEDVRLREIQPTKIPVIEERYKGPDKLTKFLVPHVNMSELIXI2RRRLQLMNAQAFVYSVSTPSEVYESEKDDGFLVYTSGENTFG  
Dre_MAP1A1B3d FEQRVEDVRLREIQPTKIPVIEERYKGPDKLTKFLVPHVNMSELIXI2RRRLQLMNAQAFVYSVSTPSEVYESEKDDGFLVYTSGENTFG  
C1n_XP_00212877_1 FEYRQKEGEKIKRKYDRIKIPVIEKAKAEKIDKIKKYLVPALTVGQFVYVZKRIKMLPPEKAIFFPTAALMSATYQEHKDDGFLVYTSGENTFG  
C1n_XP_002129578_1 FEYRQKEGEKIKRKYDRIKIPVIEKAKAEKIDKIKKYLVPALTVGQFVYVZKRIKMLPPEKAIFFPTAALMSATYQEHKDDGFLVYTSGENTFG  
C1n_XP_002129627_1 FEYRQKEGEKIKRKYDRIKIPVIEKAKAEKIDKIKKYLVPALTVGQFVYVZKRIKMLPPEKAIFFPTAALMSATYQEHKDDGFLVYTSGENTFG  
Nve_165338 FEYRQKEGEKIKRKYDRIKIPVIEKAKAEKIDKIKKYLVPALTVGQFVYVZKRIKMLPPEKAIFFPTAALMSATYQEHKDDGFLVYTSGENTFG  
Nve_181063 LEHRVCSAKIKRKYDRIKIPVIEKAKAEKIDKIKKYLVPALTVGQFVYVZKRIKMLPPEKAIFFPTAALMSATYQEHKDDGFLVYTSGENTFG  
Nve_241851 FEYRQKEGEKIKRKYDRIKIPVIEKAKAEKIDKIKKYLVPALTVGQFVYVZKRIKMLPPEKAIFFPTAALMSATYQEHKDDGFLVYTSGENTFG  
Nve_121733 FEYRQKEGEKIKRKYDRIKIPVIEKAKAEKIDKIKKYLVPALTVGQFVYVZKRIKMLPPEKAIFFPTAALMSATYQEHKDDGFLVYTSGENTFG  
Hhug_XP_002170100_1 FEYRQKEGEKIKRKYDRIKIPVIEKAKAEKIDKIKKYLVPALTVGQFVYVZKRIKMLPPEKAIFFPTAALMSATYQEHKDDGFLVYTSGENTFG  
Hhug_XP_002163070_1 FEYRQKEGEKIKRKYDRIKIPVIEKAKAEKIDKIKKYLVPALTVGQFVYVZKRIKMLPPEKAIFFPTAALMSATYQEHKDDGFLVYTSGENTFG  
Hhug_XP_002163175_1 FEYRQKEGEKIKRKYDRIKIPVIEKAKAEKIDKIKKYLVPALTVGQFVYVZKRIKMLPPEKAIFFPTAALMSATYQEHKDDGFLVYTSGENTFG  
Aml_AT68      FEYRQKEGEKIKRKYDRIKIPVIEKAKAEKIDKIKKYLVPALTVGQFVYVZKRIKMLPPEKAIFFPTAALMSATYQEHKDDGFLVYTSGENTFG  
Aml_XP_002384394_1 FEYRQKEGEKIKRKYDRIKIPVIEKAKAEKIDKIKKYLVPALTVGQFVYVZKRIKMLPPEKAIFFPTAALMSATYQEHKDDGFLVYTSGENTFG  
Aml_MAP1A1B3C FEQRVEDVRLREIQPTKIPVIEERYKGPDKLTKFLVPHVNMSELIXI2RRRLQLMNAQAFVYSVSTPSEVYESEKDDGFLVYTSGENTFG  
Aml_MAP1A1B3D FEQRVEDVRLREIQPTKIPVIEERYKGPDKLTKFLVPHVNMSELIXI2RRRLQLMNAQAFVYSVSTPSEVYESEKDDGFLVYTSGENTFG  
Aml_GABA_RAP2 LEHRVCSAKIKRKYDRIKIPVIEKAKAEKIDKIKKYLVPALTVGQFVYVZKRIKMLPPEKAIFFPTAALMSATYQEHKDDGFLVYTSGENTFG  
Aml_GABA_RAP3 FEQRVEDVRLREIQPTKIPVIEERYKGPDKLTKFLVPHVNMSELIXI2RRRLQLMNAQAFVYSVSTPSEVYESEKDDGFLVYTSGENTFG  
Tod_37001 FEYRQKEGEKIKRKYDRIKIPVIEKAKAEKIDKIKKYLVPALTVGQFVYVZKRIKMLPPEKAIFFPTAALMSATYQEHKDDGFLVYTSGENTFG  
Tod_35852 FEYRQKEGEKIKRKYDRIKIPVIEKAKAEKIDKIKKYLVPALTVGQFVYVZKRIKMLPPEKAIFFPTAALMSATYQEHKDDGFLVYTSGENTFG  
Tod_15002 FEYRQKEGEKIKRKYDRIKIPVIEKAKAEKIDKIKKYLVPALTVGQFVYVZKRIKMLPPEKAIFFPTAALMSATYQEHKDDGFLVYTSGENTFG  
Tod_57027 FEYRQKEGEKIKRKYDRIKIPVIEKAKAEKIDKIKKYLVPALTVGQFVYVZKRIKMLPPEKAIFFPTAALMSATYQEHKDDGFLVYTSGENTFG  
;
```

end;
